# Supplementary material for: Poor Statistical Power in Population-based Association Study of Gene Interaction
Source: Research Square preprint supplement (doi:10.21203/rs.3.rs-3144745/v1), 2023-07-24
Supplement: Supplementary file 1 [file 5a334c1d28e797fb68d25e3f.pdf]

## Supplementary Methods

1. The calculation process of  $Cov(f_{11D} + f_{12D}, f_{11D} + f_{21D})$ ,  $Cov(f_{11d} + f_{12d}, f_{11d} + f_{21d})$  and  $E(\hat{\beta}_D)$

From the nature of covariance, mathematical expectation definition and the nature of covariance, we can get

$$\begin{aligned}
 & Cov(f_{11D} + f_{12D}, f_{11D} + f_{21D}) \\
 &= E\{[\hat{f}_{11D} + \hat{f}_{12D} - E(f_{11D} + f_{12D})][\hat{f}_{11D} + \hat{f}_{21D} - E(f_{11D} + f_{21D})]\} \\
 &= E\{[\hat{f}_{11D} + \hat{f}_{12D} - (f_{11D} + f_{12D})][\hat{f}_{11D} + \hat{f}_{21D} - (f_{11D} + f_{21D})]\} \\
 &= E[(\hat{f}_{11D} + \hat{f}_{12D})(\hat{f}_{11D} + \hat{f}_{21D})] - (f_{11D} + f_{12D}) \cdot (f_{11D} + f_{21D}) \\
 &= E[\hat{f}_{11D}^2 + \hat{f}_{12D} \cdot \hat{f}_{11D} + \hat{f}_{11D} \hat{f}_{21D} + \hat{f}_{12D} \hat{f}_{21D}] - (f_{11D} + f_{12D}) \cdot (f_{11D} + f_{21D}), \quad (a)
 \end{aligned}$$

$$E(\hat{f}_{11D}^2) = Var(\hat{f}_{11D}) + E^2(\hat{f}_{11D}) = \frac{f_{11D}(1 - f_{11D})}{n_D} + f_{11D}^2, \quad (b)$$

$$\begin{aligned}
 E(\hat{f}_{12D} \cdot \hat{f}_{11D}) &= Cov(\hat{f}_{12D}, \hat{f}_{11D}) + E(\hat{f}_{12D})E(\hat{f}_{11D}) \\
 &= -\frac{f_{12D} \cdot f_{11D}}{n_D} + f_{12D} \cdot f_{11D}, \quad (c)
 \end{aligned}$$

$$\begin{aligned}
 E(\hat{f}_{11D} \cdot \hat{f}_{21D}) &= Cov(\hat{f}_{11D}, \hat{f}_{21D}) + E(\hat{f}_{11D})E(\hat{f}_{21D}) \\
 &= -\frac{f_{11D} \cdot f_{21D}}{n_D} + f_{11D} \cdot f_{21D}, \quad (d)
 \end{aligned}$$

$$\begin{aligned}
 E(\hat{f}_{12D} \cdot \hat{f}_{21D}) &= Cov(\hat{f}_{12D}, \hat{f}_{21D}) + E(\hat{f}_{12D})E(\hat{f}_{21D}) \\
 &= -\frac{f_{12D} \cdot f_{21D}}{n_D} + f_{12D} \cdot f_{21D}. \quad (e)
 \end{aligned}$$

and

From Equation a, Equation b, Equation c, Equation d and Equation e in the supplementary methods, we can get

$$\begin{aligned}
& Cov(f_{11D} + f_{12D}, f_{11D} + f_{21D}) \\
&= E[\hat{f}_{11D}^2 + \hat{f}_{12D} \cdot \hat{f}_{11D} + \hat{f}_{11D} \cdot \hat{f}_{21D} + \hat{f}_{12D} \cdot \hat{f}_{21D}] - (f_{11D} + f_{12D}) \cdot (f_{11D} + f_{21D}) \\
&= \frac{f_{11D} \cdot (1 - f_{11D})}{n_D} + f_{11D}^2 + (-\frac{f_{12D} \cdot f_{11D}}{n_D} + f_{12D} \cdot f_{11D}) + \dots \\
& \quad (-\frac{f_{11D} \cdot f_{21D}}{n_D} + f_{11D} \cdot f_{21D}) + (-\frac{f_{12D} \cdot f_{21D}}{n_D} + f_{12D} \cdot f_{21D}) - (f_{11D} + f_{12D}) \cdot (f_{11D} + f_{21D}) \\
&= \frac{f_{11D} \cdot (1 - f_{11D}) - f_{12D} \cdot f_{11D} - f_{11D} \cdot f_{21D} - f_{12D} \cdot f_{21D}}{n_D} + \dots \\
& \quad f_{11D}^2 + f_{12D} \cdot f_{11D} + f_{11D} \cdot f_{21D} + f_{12D} \cdot f_{21D} - (f_{11D} + f_{12D}) \cdot (f_{11D} + f_{21D}) \\
&= \frac{f_{11D} \cdot (1 - f_{11D}) - f_{12D} \cdot f_{11D} - f_{11D} \cdot f_{21D} - f_{12D} \cdot f_{21D}}{n_D} \\
&= \frac{f_{11D} \cdot (1 - f_{11D} - f_{12D} - f_{21D}) - f_{12D} \cdot f_{21D}}{n_D} \\
&= \frac{f_{11D} \cdot f_{22D} - f_{12D} \cdot f_{21D}}{n_D} \tag{f}
\end{aligned}$$

From

$$\begin{aligned}
& f_{11D} - (f_{11D} + f_{12D}) \cdot (f_{11D} + f_{21D}) \\
&= f_{11D} - (f_{11D}^2 + f_{11D} \cdot f_{21D} + f_{12D} \cdot f_{11D} + f_{12D} \cdot f_{21D}), \\
&= f_{11D} \cdot (1 - f_{11D} - f_{21D} - f_{12D}) - f_{12D} \cdot f_{21D} \\
&= f_{11D} \cdot f_{22D} - f_{12D} \cdot f_{21D}
\end{aligned} \tag{g}$$

we can get

$$Cov(f_{11D} + f_{12D}, f_{11D} + f_{21D}) = \frac{f_{11D} - (f_{11D} + f_{12D}) \cdot (f_{11D} + f_{21D})}{n_D} \tag{h}$$

In the same way,  $Cov(f_{11d} + f_{12d}, f_{11d} + f_{21d})$  can be calculated as

$$Cov(f_{11d} + f_{12d}, f_{11d} + f_{21d}) = \frac{f_{11d} - (f_{11d} + f_{12d}) \cdot (f_{11d} + f_{21d})}{n_d} \tag{i}$$

From Equation 5, Equation 6, Equation 7 in the main body and the nature of the mathematical expectation,  $E(\hat{\beta}_D)$  can be calculated as

$$\begin{aligned}
E(\hat{\beta}_D) &= E(\hat{f}_{11D}) - E[(\hat{f}_{11D} + \hat{f}_{12D}) \cdot (\hat{f}_{11D} + \hat{f}_{21D})] \\
&= f_{11D} - [E(\hat{f}_{11D} + \hat{f}_{12D}) \cdot E(\hat{f}_{11D} + \hat{f}_{21D}) + Cov(f_{11D} + f_{12D}, f_{11D} + f_{21D})] \quad (j) \\
&= f_{11D} - [(f_{11D} + f_{12D}) \cdot (f_{11D} + f_{21D}) + Cov(f_{11D} + f_{12D}, f_{11D} + f_{21D})] \\
&= f_{11D} \cdot f_{22D} - f_{12D} \cdot f_{21D} - Cov(f_{11D} + f_{12D}, f_{11D} + f_{21D})
\end{aligned}$$

2. The calculation process of  $f_{11D}, f_{12D}, f_{22D}, f_{21D}, f_{11d}, f_{12d}, f_{22d}$  and  $f_{21d}$

As  $X_1, X_2, M_1$  and  $M_2$  have two possible values: 0 and 1 respectively,  $f_{11D}$  can be calculated using Equation 7 in the main body and Multiplicative Theorem of Conditional Probability as follows

$$\begin{aligned}
 f_{11D} &= P(M_1=1, M_2=1 | D) \\
 &= P(M_1=1, M_2=1, X_1=1, X_2=1 | D) + P(M_1=1, M_2=1, X_1=0, X_2=1 | D) + \dots \\
 &\quad P(M_1=1, M_2=1, X_1=1, X_2=0 | D) + P(M_1=1, M_2=1, X_1=0, X_2=0 | D) \\
 &= P(M_1=1, M_2=1 | X_1=1, X_2=1) \cdot P(X_1=1, X_2=1 | D) + \dots \quad (k) \\
 &\quad P(M_1=1, M_2=1 | X_1=0, X_2=1) \cdot P(X_1=0, X_2=1 | D) + \dots \\
 &\quad P(M_1=1, M_2=1 | X_1=1, X_2=0) \cdot P(X_1=1, X_2=0 | D) + \dots \\
 &\quad P(M_1=1, M_2=1 | X_1=0, X_2=0) \cdot P(X_1=0, X_2=0 | D)
 \end{aligned}$$

Because  $X_1$  and  $M_2$  are unlinked and  $X_2$  and  $M_1$  are unlinked, we can conclude that

$$\begin{aligned}
 P(M_1=1, M_2=1 | X_1=1, X_2=1) &= P(M_1=1 | X_1=1) P(M_2=1 | X_2=1) \\
 P(M_1=1, M_2=1 | X_1=0, X_2=1) &= P(M_1=1 | X_1=0) P(M_2=1 | X_2=1) \\
 P(M_1=1, M_2=1 | X_1=1, X_2=0) &= P(M_1=1 | X_1=1) P(M_2=1 | X_2=0) \quad (l) \\
 P(M_1=1, M_2=1 | X_1=0, X_2=0) &= P(M_1=1 | X_1=0) P(M_2=1 | X_2=0)
 \end{aligned}$$

According to Bayesian conditional probability formula and Equation 6 in the main body, eight conditional probabilities can be calculated as

$$\begin{aligned}
P(M_1=1|X_1=1) &= \frac{P(M_1=1, X_1=1)}{P(X_1=1)} = \frac{P(M_1=1) \cdot P(X_1=1) + LD_{X1,M1}}{P(X_1=1)} \\
P(M_2=1|X_2=1) &= \frac{P(M_2=1, X_2=1)}{P(X_2=1)} = \frac{P(M_2=1) \cdot P(X_2=1) + LD_{X2,M2}}{P(X_2=1)} \\
P(M_1=1|X_1=0) &= \frac{P(M_1=1, X_1=0)}{P(X_1=0)} = \frac{P(M_1=1) \cdot [1 - P(X_1=1)] + LD_{X1,M1}}{1 - P(X_1=1)} \\
P(M_2=1|X_2=0) &= \frac{P(M_2=1, X_2=0)}{P(X_2=0)} = \frac{P(M_2=1) \cdot [1 - P(X_2=1)] + LD_{X2,M2}}{1 - P(X_2=1)} \\
P(M_1=0|X_1=1) &= \frac{P(M_1=0, X_1=1)}{P(X_1=1)} = \frac{[1 - P(M_1=1)] \cdot P(X_1=1) + LD_{X1,M1}}{P(X_1=1)} \\
P(M_2=0|X_2=1) &= \frac{P(M_2=0, X_2=1)}{P(X_2=1)} = \frac{[1 - P(M_2=1)] \cdot P(X_2=1) + LD_{X2,M2}}{P(X_2=1)} \\
P(M_1=0|X_1=0) &= \frac{P(M_1=0, X_1=0)}{P(X_1=0)} = \frac{[1 - P(M_1=1)] \cdot [1 - P(X_1=1)] + LD_{X1,M1}}{1 - P(X_1=1)} \\
P(M_2=0|X_2=0) &= \frac{P(M_2=0, X_2=0)}{P(X_2=0)} = \frac{[1 - P(M_2=1)] \cdot [1 - P(X_2=1)] + LD_{X2,M2}}{1 - P(X_2=1)}. \quad (m)
\end{aligned}$$

Thus,  $P(M_1=1, M_2=1|X_1=1, X_2=1), P(M_1=1, M_2=1|X_1=0, X_2=1),$

$P(M_1=1, M_2=1|X_1=1, X_2=0)$  and  $P(M_1=1, M_2=1|X_1=0, X_2=1)$  can be

calculated according to Equation m in the supplementary methods.

Assume that  $P(X_1=1, X_2=1|D) = (1+K)P(X_1=1|D)P(X_2=1|D)$ , from

Equation 6 in the main body we can conclude that

$$\begin{aligned}
P(X_1=1, X_2=0|D) &= P(X_1=1|D) - P(X_1=1, X_2=1|D) \\
P(X_1=0, X_2=1|D) &= P(X_2=1|D) - P(X_1=1, X_2=1|D) \\
P(X_1=0, X_2=0|D) &= 1 - P(X_1=1, X_2=1|D) - P(X_1=1, X_2=0|D) - P(X_1=0, X_2=1|D)
\end{aligned} \quad (n)$$

From Bayesian conditional probability formula, Equation 6 and Equation 10 in the main body we can conclude that

$$\begin{aligned}
RR_{X_1} &= \frac{P(D | X_1 = 1)}{P(D | X_1 = 0)} \\
&= \frac{P(D, X_1 = 1) / P(X_1 = 1)}{P(D, X_1 = 0) / P(X_1 = 0)} \\
&= \frac{P(D, X_1 = 1) \cdot P(X_1 = 0)}{P(D, X_1 = 0) \cdot P(X_1 = 1)} \\
&= \frac{P(X_1 = 1 | D) \cdot P(X_1 = 0)}{[1 - P(X_1 = 1 | D)] \cdot P(X_1 = 1)} \quad , \quad (o) \\
RR_{X_1} \cdot P(X_1 = 1) \cdot [1 - P(X_1 = 1 | D)] &= P(X_1 = 0) \cdot P(X_1 = 1 | D) \\
RR_{X_1} \cdot P(X_1 = 1) &= RR_{X_1} \cdot P(X_1 = 1) \cdot P(X_1 = 1 | D) + P(X_1 = 0) \cdot P(X_1 = 1 | D) \\
RR_{X_1} \cdot P(X_1 = 1) &= [RR_{X_1} \cdot P(X_1 = 1) + P(X_1 = 0)] \cdot P(X_1 = 1 | D)
\end{aligned}$$

$$P(X_1 = 1 | D) = \frac{RR_{X_1} \cdot P(X_1 = 1)}{RR_{X_1} \cdot P(X_1 = 1) + P(X_1 = 0)} \quad , \quad (p)$$

$$P(X_2 = 1 | D) = \frac{RR_{X_2} \cdot P(X_2 = 1)}{RR_{X_2} \cdot P(X_2 = 1) + P(X_2 = 0)} \quad . \quad (q)$$

According to Equation n, Equation p and Equation q,  $P(X_1 = 1, X_2 = 1 | D)$ ,  $P(X_1 = 1, X_2 = 0 | D)$ ,  $P(X_1 = 0, X_2 = 1 | D)$  and  $P(X_1 = 0, X_2 = 0 | D)$  can be

calculated using known parameters as follows

$$\begin{aligned}
P(X_1 = 1, X_2 = 1 | D) &= (1+K) \cdot P(X_1 = 1 | D) \cdot P(X_2 = 1 | D) \\
P(X_1 = 1, X_2 = 0 | D) &= P(X_1 = 1 | D) - (1+K) \cdot P(X_1 = 1 | D) \cdot P(X_2 = 1 | D) \\
P(X_1 = 0, X_2 = 1 | D) &= P(X_2 = 1 | D) - (1+K) \cdot P(X_1 = 1 | D) \cdot P(X_2 = 1 | D) \\
P(X_1 = 0, X_2 = 0 | D) &= 1 - P(X_1 = 1 | D) - P(X_2 = 1 | D) + (1+K) \cdot P(X_1 = 1 | D) \cdot P(X_2 = 1 | D)
\end{aligned} \quad .(r)$$

Thus,  $f_{11D}$  can be calculated from Equation k, Equation m and Equation r.

$f_{12D}, f_{22D}, f_{21D}, f_{11d}, f_{12d}, f_{22d}$  and  $f_{21d}$  can be calculated in the same way.
